# Supplementary material for: Fire risk: an integrated modelling approach
Source: Copernicus journal article supplement (doi:10.5194/egusphere-2023-138), 2023-02-20
Supplement: Supplementary file 1 [file egusphere-2023-138-supplement.pdf]

# Supplement of Fire risk: an integrated modelling approach

Alba Marquez Torres<sup>1</sup>, Giovanni Signorello<sup>2</sup>, Sudeshna Kumar<sup>2</sup>, Greta Adamo<sup>1</sup>, Ferdinando Villa<sup>1,3</sup>, Stefano Balbi<sup>1,3</sup>

<sup>1</sup>Basque Centre for Climate Change (BC3), Leioa, 48940, Spain

<sup>2</sup>University of Catania, Department of Agriculture, Food and Environment, Catania, 95131, Italy

<sup>3</sup>Centre for the Conservation and Management of Nature and Agroecosystems (CUTGAN), Catania, 95123, Italy

<sup>4</sup>IKERBASQUE, Basque Foundation for Science, Bilbao, 48009, Spain.

Correspondence to: Alba Marquez Torres (alba.marquez@bc3research.org)

## S1

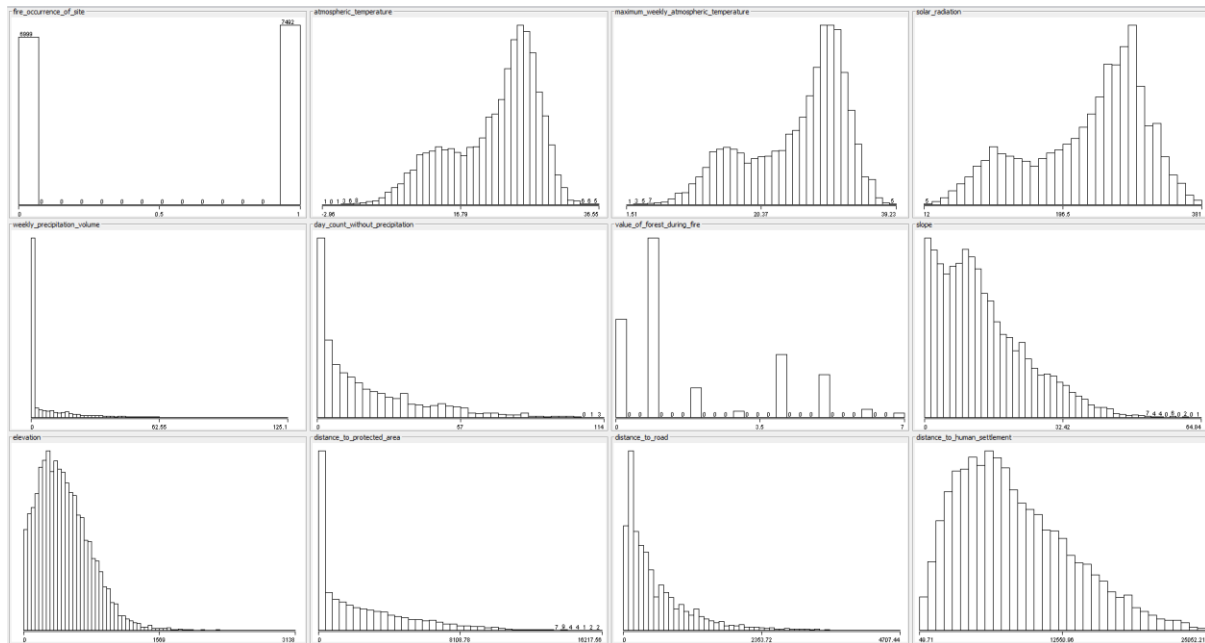

Figure S1. Distribution of the variables used on the fire occurrence modelling.

Table S1. Fuel type classifications developed for Mediterranean ecosystems (Lasaponara et al., 2006).

|   | Fuel type                                                        | Description                                                                                                                                                                                               |
|---|------------------------------------------------------------------|-----------------------------------------------------------------------------------------------------------------------------------------------------------------------------------------------------------|
| 1 | Ground fuels (cover >50%)                                        | Grass                                                                                                                                                                                                     |
| 2 | Surface fuels (shrub cover >60%; tree cover <50%)                | Grassland, shrubland (smaller than 0.3-0.6m and with a high percentage of grassland), and clear-cuts, where slash was not removed.                                                                        |
| 3 | Medium-height shrubs (shrub cover >60%; tree cover <50%)         | Shrubs between 0.6 and 2.0 m.                                                                                                                                                                             |
| 4 | Tall shrubs (shrub cover >60%; tree cover <50%)                  | High shrubs (between 2.0 and 4.0 m) and young trees resulting from natural regeneration or forestation                                                                                                    |
| 5 | Tree stands (>4m) with a clean ground surface (shrub cover <30%) | The ground fuel was removed either by prescribed burning or by mechanical means. This situation may also occur in closed canopies in which the lack of sunlight inhibits the growth of surface vegetation |
| 6 | Tree stands (>4m) with medium surface fuels (shrubs cover >30%)  | The base of the canopies is well above the surface fuel layer (>0.5). The fuel consists essentially of small shrubs, grass, litter, and duff.                                                             |

|   |                                                              |                                                                                                           |
|---|--------------------------------------------------------------|-----------------------------------------------------------------------------------------------------------|
| 7 | Tree stand (>4m) with heavy surface fuels (shrub cover >30%) | Stands with a very dense surface fuel layer and with a very small vertical gap to the canopy base (<0.5m) |
|---|--------------------------------------------------------------|-----------------------------------------------------------------------------------------------------------|

## S2

**Table S2. Intervals of Explanatory variables.**

|                            | Range          | B1      | B2      | B3      | B4       | B5       | B6    | B7    | B8    | B9    | B10   |
|----------------------------|----------------|---------|---------|---------|----------|----------|-------|-------|-------|-------|-------|
| slope                      | 0.00-64.84     | 2.19    | 6.83    | 11.67   | 18.11    | 43.49    |       |       |       |       |       |
| elevation                  | 0.00-3138.00   | 101.25  | 276.50  | 430.50  | 612.00   | 1925.75  |       |       |       |       |       |
| distance to road           | 0.00-4707.44   | 60.36   | 206.07  | 398.19  | 718.81   | 2820.06  |       |       |       |       |       |
| value forest               | 0.00-7.00      | 0.50    | 1.50    | 2.50    | 3.50     | 4.50     | 5.50  | 6.50  |       |       |       |
| max weekly temp            | 1.51-27.92     | 3.40    | 7.17    | 10.94   | 14.72    | 18.49    | 22.26 | 26.03 | 29.80 | 33.58 | 37.35 |
| acc week prec              | 0.00-18.75     | 0.03    | 1.25    | 3.60    | 6.25     | 9.30     | 17.50 | 21.45 | 22.15 | 32.00 | 81.78 |
| day without prec           | 0.00-14.05     | 1.25    | 5.50    | 13.50   | 27.00    | 74.75    | 64.48 |       |       |       |       |
| distance to protected area | 0.00-16217.56  | 0.00    | 507.25  | 1798.49 | 3721.10  | 10538.65 |       |       |       |       |       |
| distance to human          | 46.90-25052.21 | 1969.02 | 5089.43 | 7574.89 | 10705.62 | 18800.69 |       |       |       |       |       |
| atm temperature            | -2.96-36.55    | -0.98   | 2.97    | 6.92    | 10.87    | 14.82    | 18.77 | 22.72 | 26.67 | 30.62 | 34.57 |
| solar radiation            | 12.00-381.00   | 48.90   | 122.70  | 196.50  | 270.30   | 344.10   |       |       |       |       |       |

## S3

**Table S3: Area of ecosystem services exposed (in km<sup>2</sup>) and the percentage of change.**

|             |      | low fire probability |        |         | medium fire probability |        |         | high fire probability |        |         |
|-------------|------|----------------------|--------|---------|-------------------------|--------|---------|-----------------------|--------|---------|
|             |      | low ES               | med ES | high ES | low ES                  | med ES | high ES | low ES                | med ES | high ES |
| Carbon Mass | 2020 | 10.461               | 2.091  | 522     | 3.837                   | 1.789  | 690     | 738                   | 691    | 210     |
|             | 2050 | 3.618                | 930    | 227     | 7.897                   | 1.914  | 674     | 3.389                 | 1.634  | 543     |
|             |      | -65%                 | -56%   | -57%    | 106%                    | 7%     | -2%     | 359%                  | 137%   | 159%    |

|                    |      |        |        |      |        |       |      |       |       |      |
|--------------------|------|--------|--------|------|--------|-------|------|-------|-------|------|
| Biodiversity       | 2020 | 1.513  | 10.691 | 617  | 143    | 5.157 | 857  | 70    | 1.376 | 233  |
|                    | 2050 | 938    | 3.732  | 262  | 594    | 8.585 | 846  | 167   | 4.729 | 593  |
|                    |      | -38%   | -65%   | -58% | 317%   | 66%   | -1%  | 138%  | 244%  | 155% |
| Outdoor Recreation | 2020 | 5.073  | 2.878  | 820  | 1.983  | 1.953 | 979  | 472   | 650   | 354  |
|                    | 2050 | 1.888  | 1.257  | 414  | 3.780  | 2.439 | 924  | 1.805 | 1.717 | 769  |
|                    |      | -63%   | -56%   | -50% | 91%    | 25%   | -6%  | 282%  | 164%  | 117% |
| Pollination        | 2020 | 1.773  | 509    | 409  | 1.316  | 687   | 603  | 428   | 289   | 531  |
|                    | 2050 | 880    | 284    | 221  | 1.400  | 646   | 473  | 1.126 | 552   | 829  |
|                    |      | -50%   | -44%   | -46% | 6%     | -6%   | -22% | 163%  | 91%   | 56%  |
| Soil Retention     | 2020 | 13.085 | 7      | 0    | 6.265  | 36    | 2    | 1.628 | 9     | 1    |
|                    | 2050 | 4.795  | 9      | 0    | 10.460 | 14    | 1    | 5.526 | 28    | 2    |
|                    |      | -63%   | 29%    | 0%   | 67%    | -61%  | -50% | 239%  | 211%  | 100% |
| Exposure           | 2020 | 6.381  | 3.235  | 474  | 2.709  | 1.924 | 626  | 667   | 603   | 266  |
|                    | 2050 | 2.424  | 1.242  | 225  | 4.826  | 2.719 | 584  | 2.403 | 1.732 | 547  |
|                    |      | -62%   | -62%   | -53% | 78%    | 41%   | -7%  | 260%  | 187%  | 106% |

## References

Lasaponara, R., Lanorte, A., and Pignatti, S.: Characterization and Mapping of Fuel Types for the Mediterranean Ecosystems of Pollino National Park in Southern Italy by Using Hyperspectral MIVIS Data, *Earth Interactions*, 10, 1–11, <https://doi.org/10.1175/EI165.1>, 2006.
